# Supplementary material for: A simplified pyrosequencing protocol based on linear-after-the-exponential (LATE)-PCR using whole blood as the starting material directly
Source: Royal Society of Chemistry journal article supplement (doi:10.1039/c3ay41471j), 2014-01-01
Supplement: c3ay41471j.pdf [file c3ay41471j.pdf]

A simplified pyrosequencing protocol based on linear-after-the-exponential (LATE)-PCR using  
whole blood as starting material directly

Yunlong Liu,<sup>†a, c</sup> Haiping Wu,<sup>†b</sup> Hui Ye,<sup>a, c</sup> Zhiyao Chen,<sup>a</sup> Qingxin Song,<sup>a, c</sup> Bingjie Zou,<sup>a</sup>  
Jianzhong Rui<sup>a</sup> and Guohua Zhou<sup>a, b, c, d \*</sup>

<sup>a</sup> *Department of Pharmacology, Jinling Hospital, Nanjing University School of Medicine, Nanjing  
210002, China.*

<sup>b</sup> *Huadong Research Institute for Medicine and Biotechnics, Nanjing 210002, China.*

<sup>c</sup> *China Pharmaceutical University, Nanjing 210009, China.*

<sup>d</sup> *State Key Laboratory of Analytical Chemistry for Life Science, Department of Chemistry,  
Nanjing University, Nanjing 210093, China.*

\* Corresponding author at: No. 305 Zhongshan East Road, Nanjing 210002, China. Fax: +8625  
8451 4223.

E-mail address: [ghzhou@nju.edu.cn](mailto:ghzhou@nju.edu.cn) (Guohua Zhou)

† These authors contributed equally to this work.

## Supplementary Table

Supplementary Table S1. Sequences of LATE-PCR primers

| Name <sup>a</sup> | Sequence<br>(5'-3')                           | Conc.<br>( $\mu$ M) | T <sub>m</sub> value<br>(°C) | T <sub>m</sub> <sup>L</sup> - T <sub>m</sub> <sup>X</sup> <sup>b</sup><br>(°C) | T <sub>m</sub> <sup>A</sup> <sup>c</sup><br>(°C) |
|-------------------|-----------------------------------------------|---------------------|------------------------------|--------------------------------------------------------------------------------|--------------------------------------------------|
| 677-PX            | TGTCATCCCTATTGGCAGGTTAC                       | 1                   | 65.9                         | 5.8                                                                            | 77.0                                             |
| 677-PL            | AGATCCCGGGGACGATGGGGCAAG                      | 0.1                 | 71.7                         |                                                                                |                                                  |
| 1298-PX           | GGACTACTACCTCTTCTACCTGA                       | 1                   | 63.5                         | 6.5                                                                            | 75.7                                             |
| 1298-PL           | GGGTCCCCACTCCAGCATCACTCAC                     | 0.1                 | 70.0                         |                                                                                |                                                  |
| DPYD-PX           | <u>GGG</u> <sup>d</sup> TATAAGCCTATGAATTGGATG | 1                   | 62.7                         | 7.2                                                                            | 73.8                                             |
| DPYD-PL           | TGGCCCTGGACAAAGCTCCTTTCTGA                    | 0.1                 | 69.9                         |                                                                                |                                                  |

<sup>a</sup> PX mean excess primer, PL mean limiting primer; <sup>b</sup> T<sub>m</sub><sup>L</sup> and T<sub>m</sub><sup>X</sup> mean the T<sub>m</sub> value of limiting primer and excess primer, respectively; <sup>c</sup> T<sub>m</sub><sup>A</sup> mean the T<sub>m</sub> value of amplicons; <sup>d</sup>: underlined letters were artificially mismatched bases.

## Supplementary Figure Captions

Supplementary Fig. S1. The principle of linear-after-the-exponential (LATE)-PCR.

Supplementary Fig. S2. Pyrograms for genotyping MTHFR C677T in a set of five typical samples in triplicate.

Supplementary Fig. S3. The genotyping results of the 3 polymorphisms from the same sample using the whole blood LATE-PCR based pyrosequencing(A), conventional PCR based pyrosequencing(B) and commercial Sanger sequencing(C).

Supplementary Figures

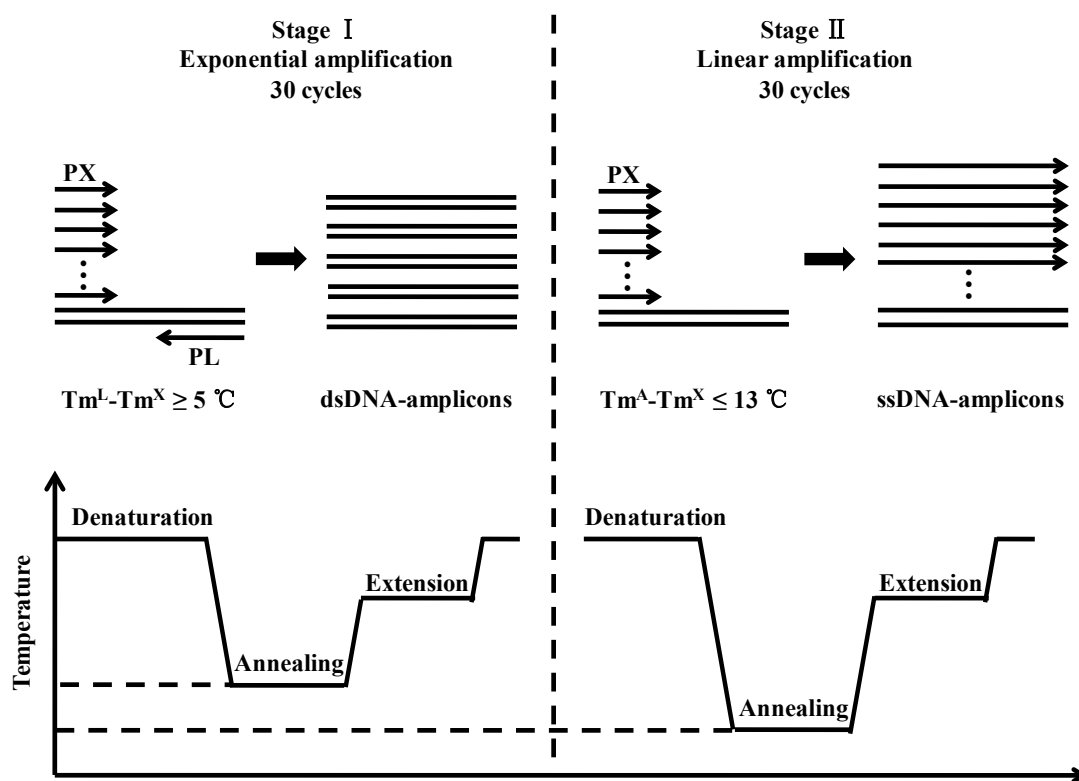

Supplementary Fig. S1. The principle of linear-after-the-exponential (LATE)-PCR.

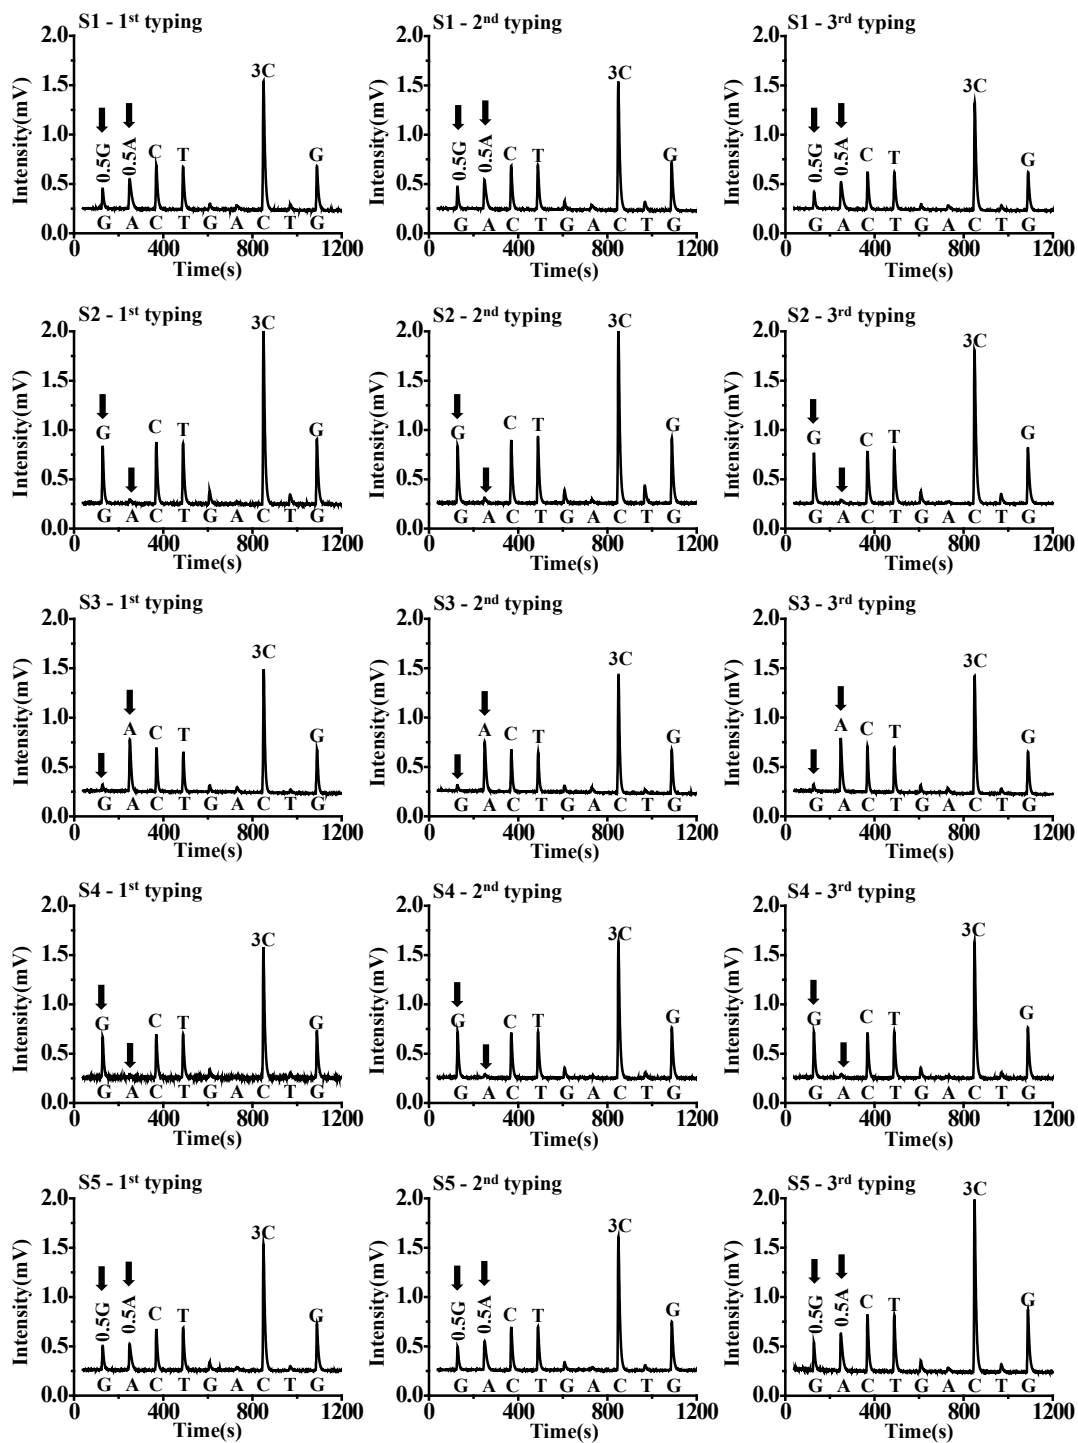

Supplementary Fig. S2. Pyrograms for genotyping MTHFR C677T in a set of five typical samples in triplicate.

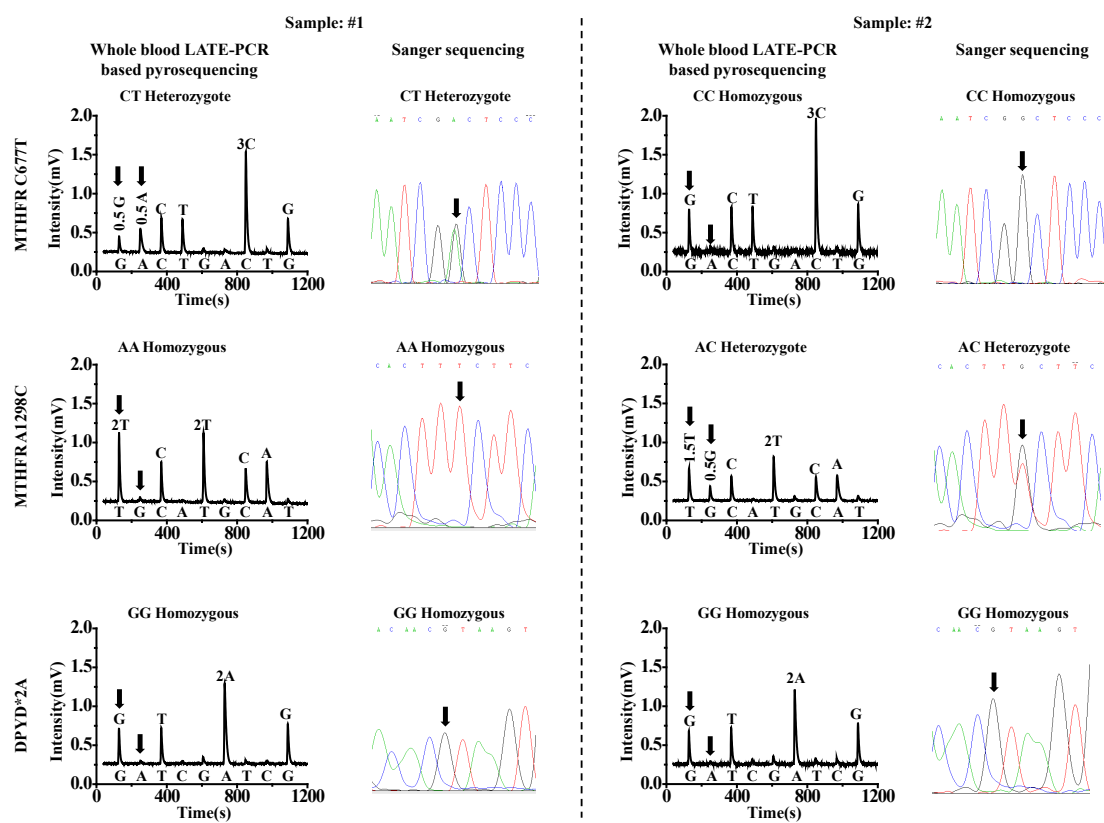

Supplementary Fig. S3. The genotyping results of the 3 polymorphisms from the same sample using the whole blood LATE-PCR based pyrosequencing and commercial Sanger sequencing.
